# Supplementary figures and images for: Highly stereoselective synthesis of aminoglycosides via rhodium-catalyzed and substrate-controlled aziridination of glycals
Source: Royal Society of Chemistry journal article supplement (doi:10.1039/b823099b), 2009-01-01

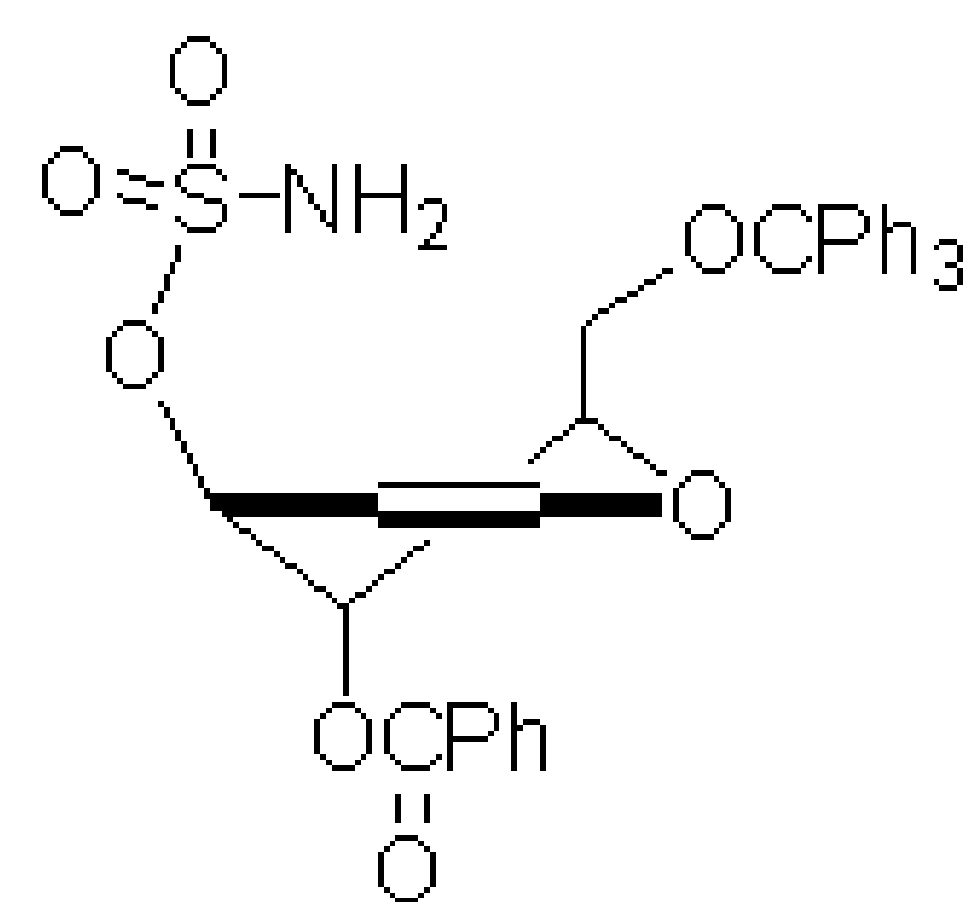

1

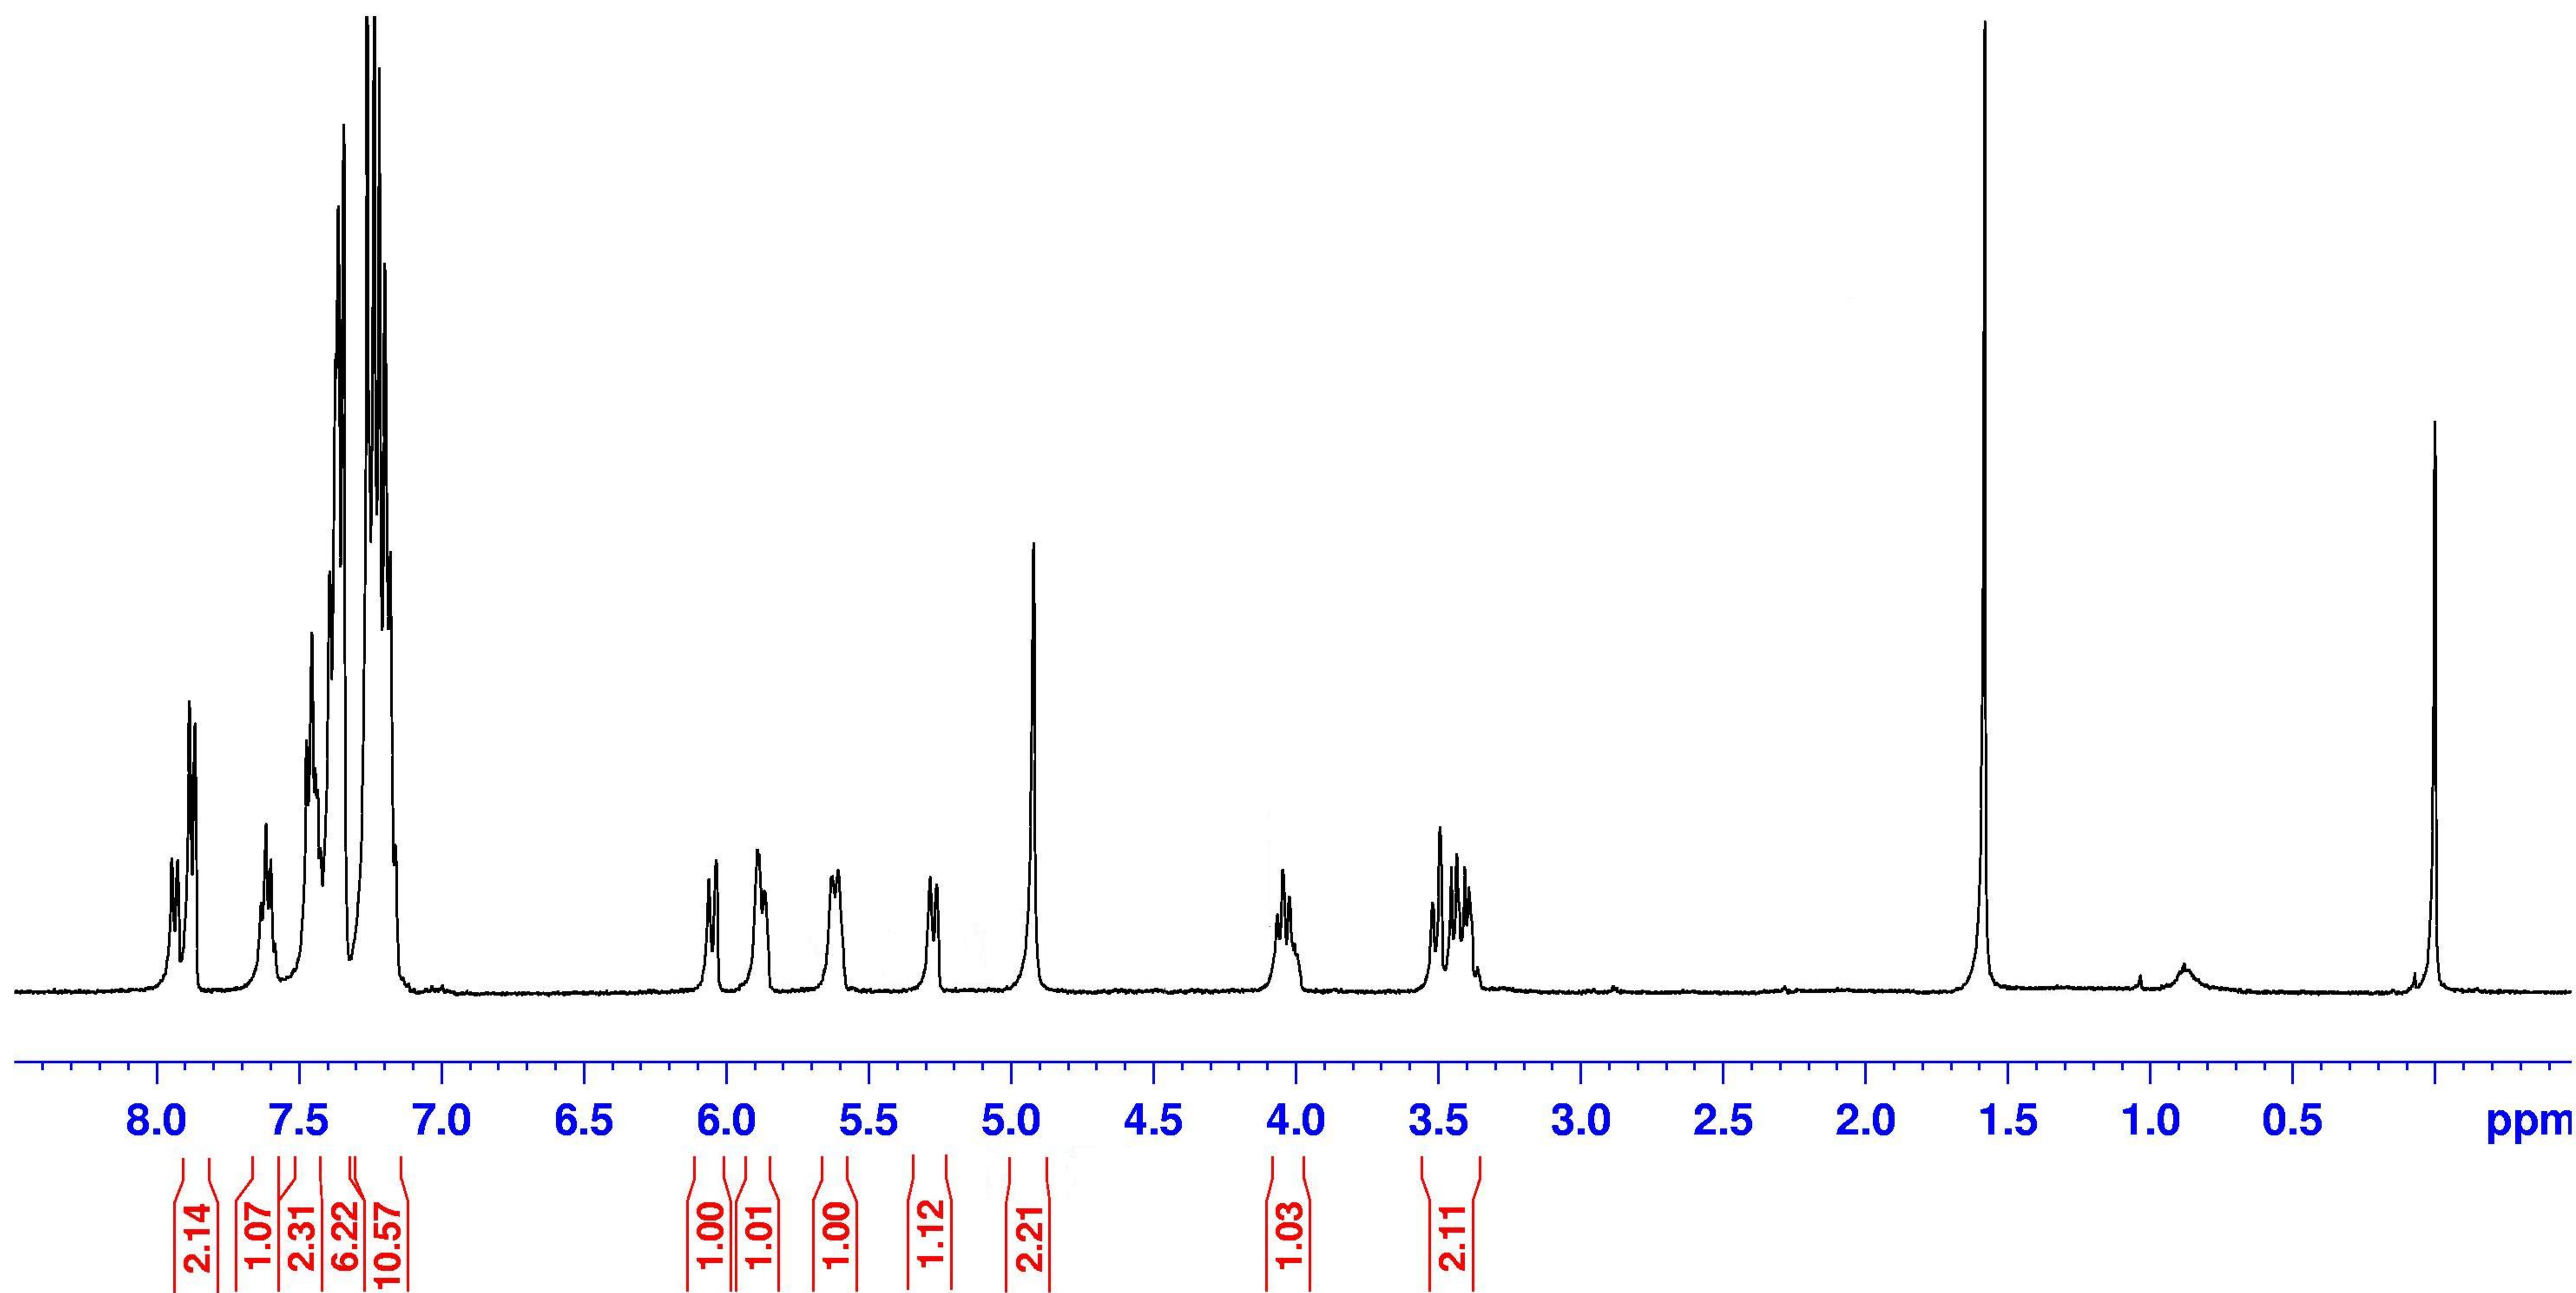

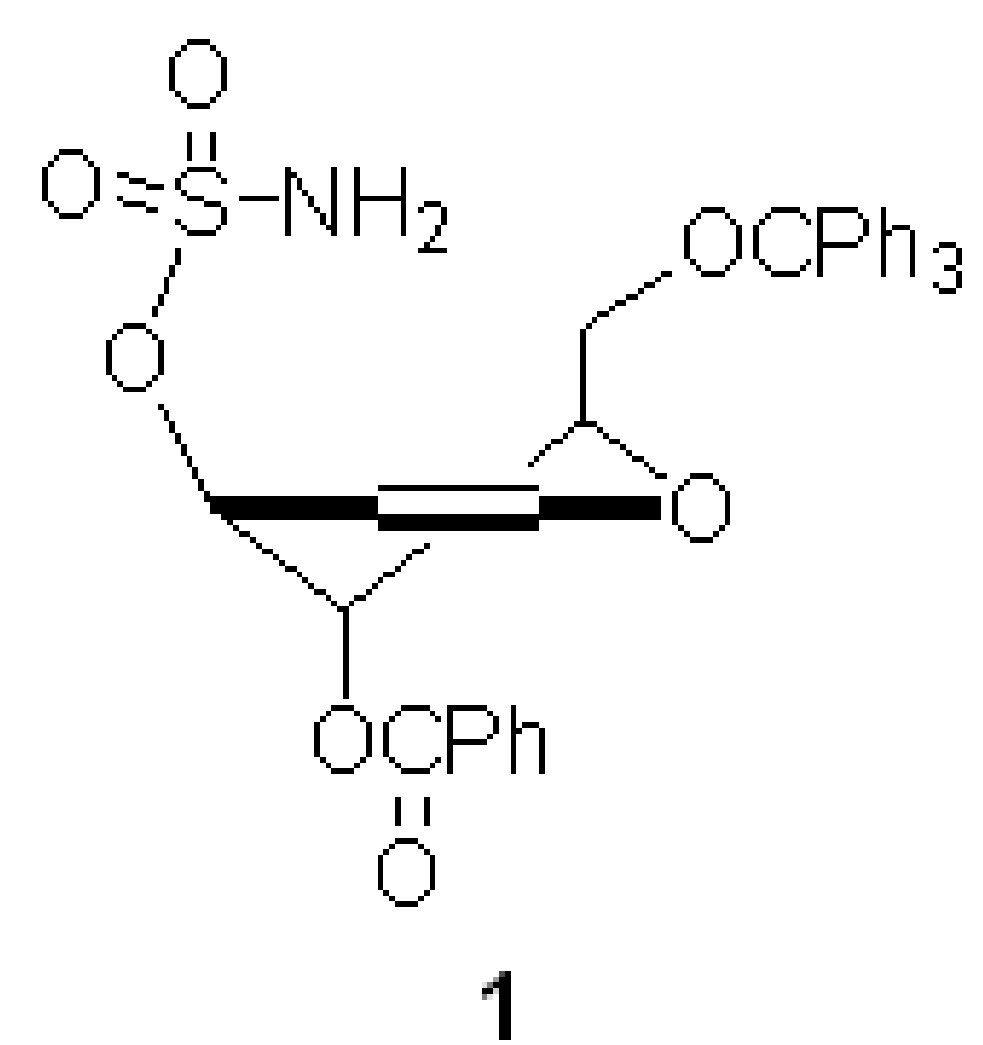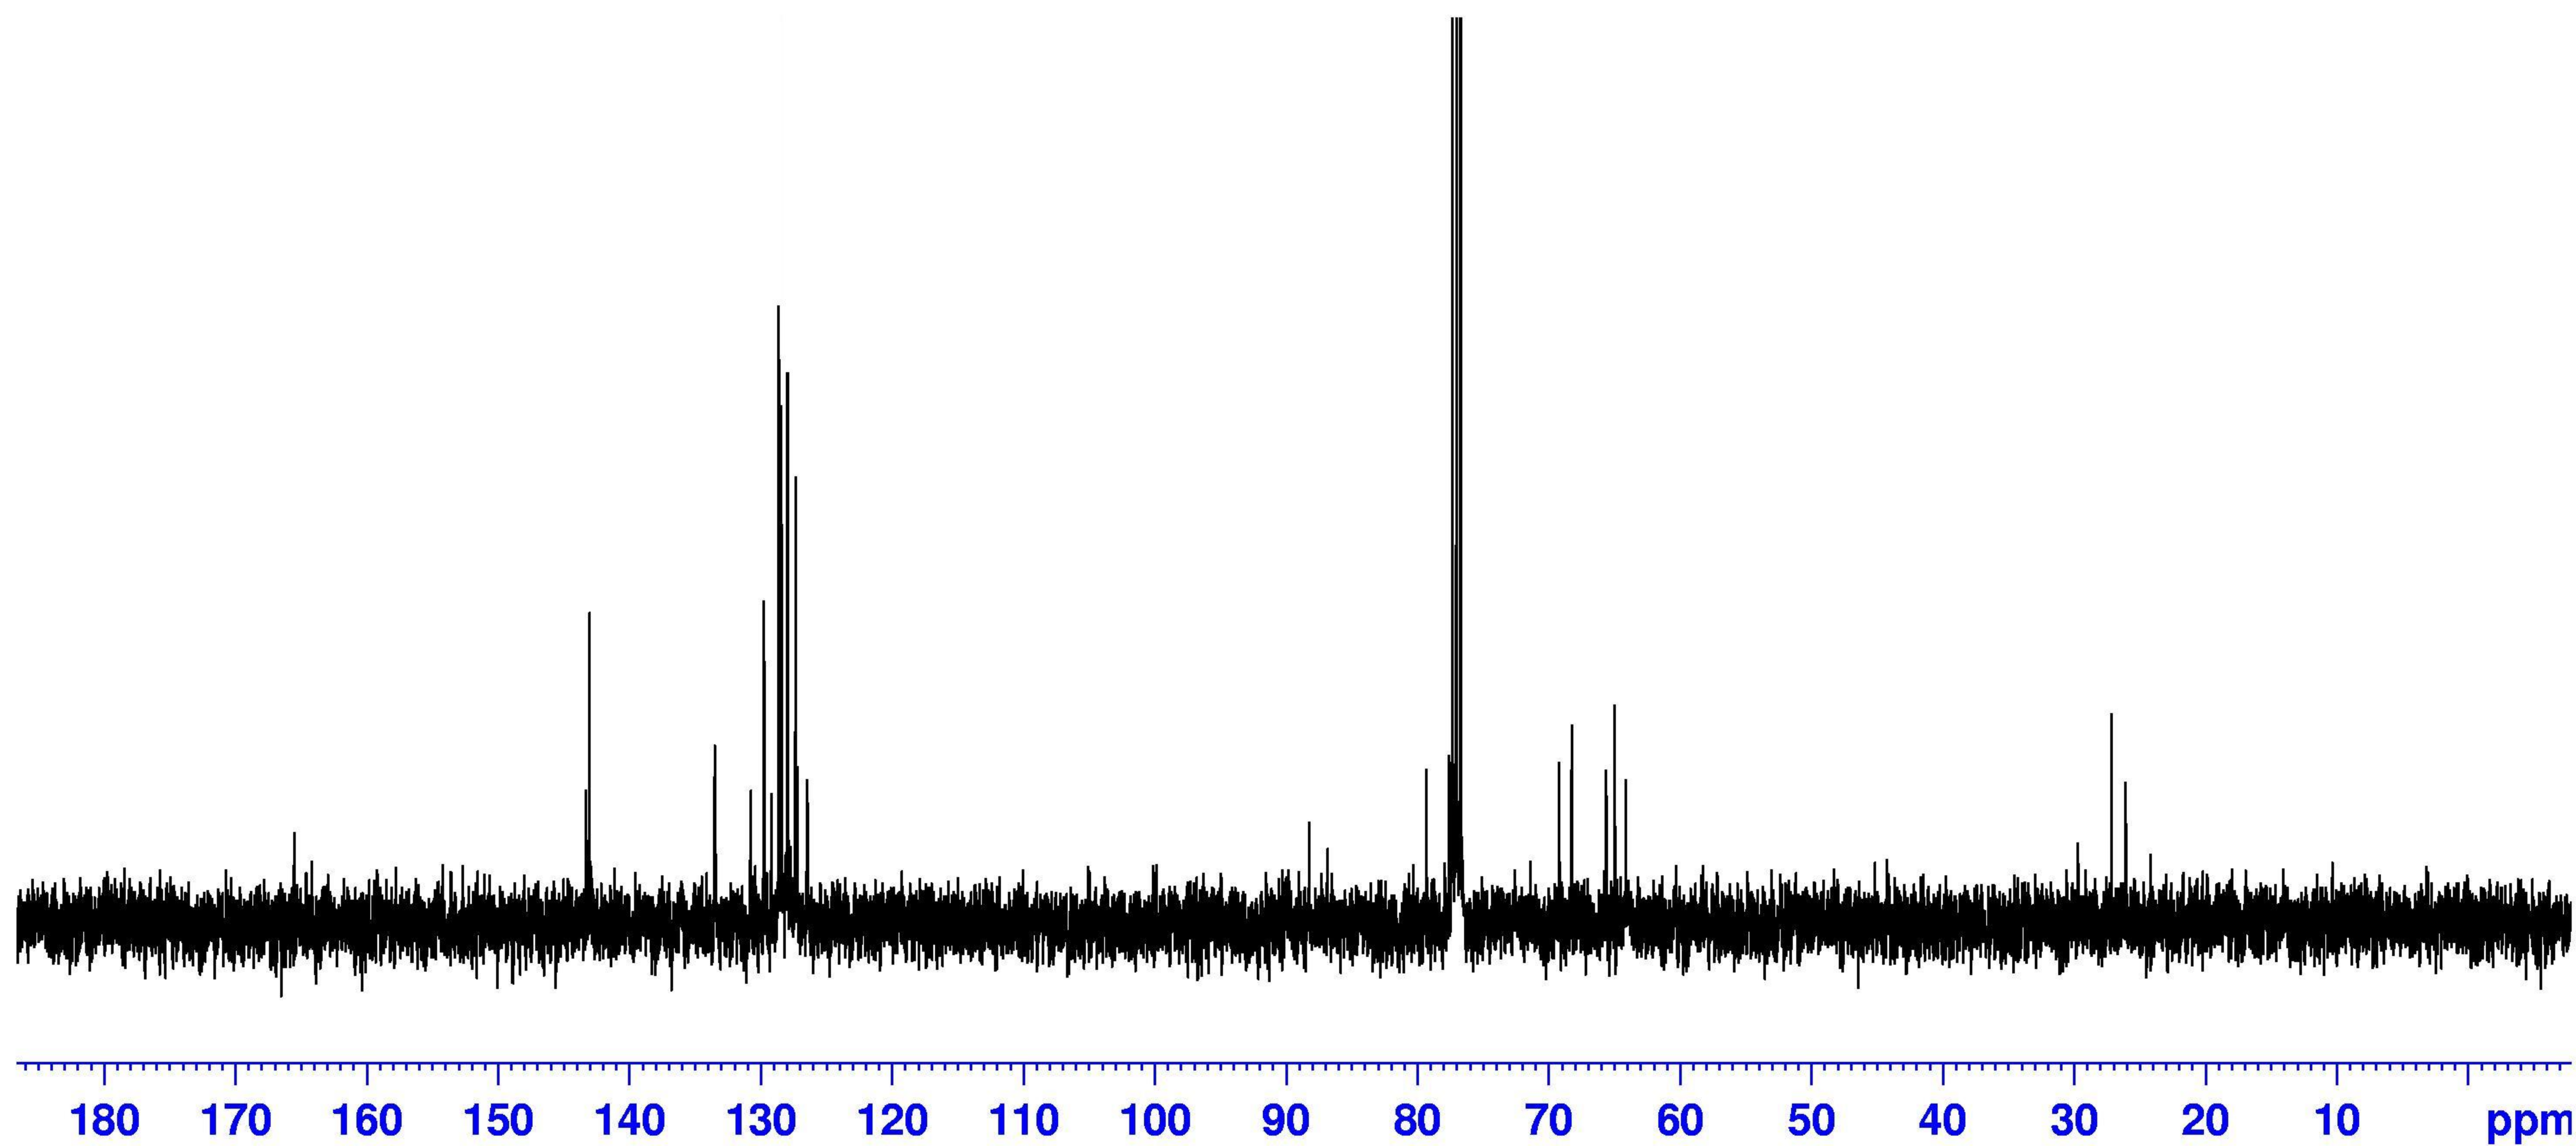

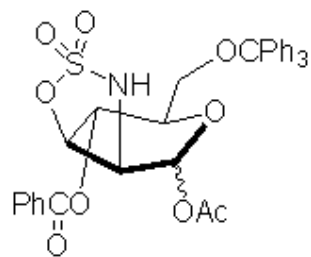

6

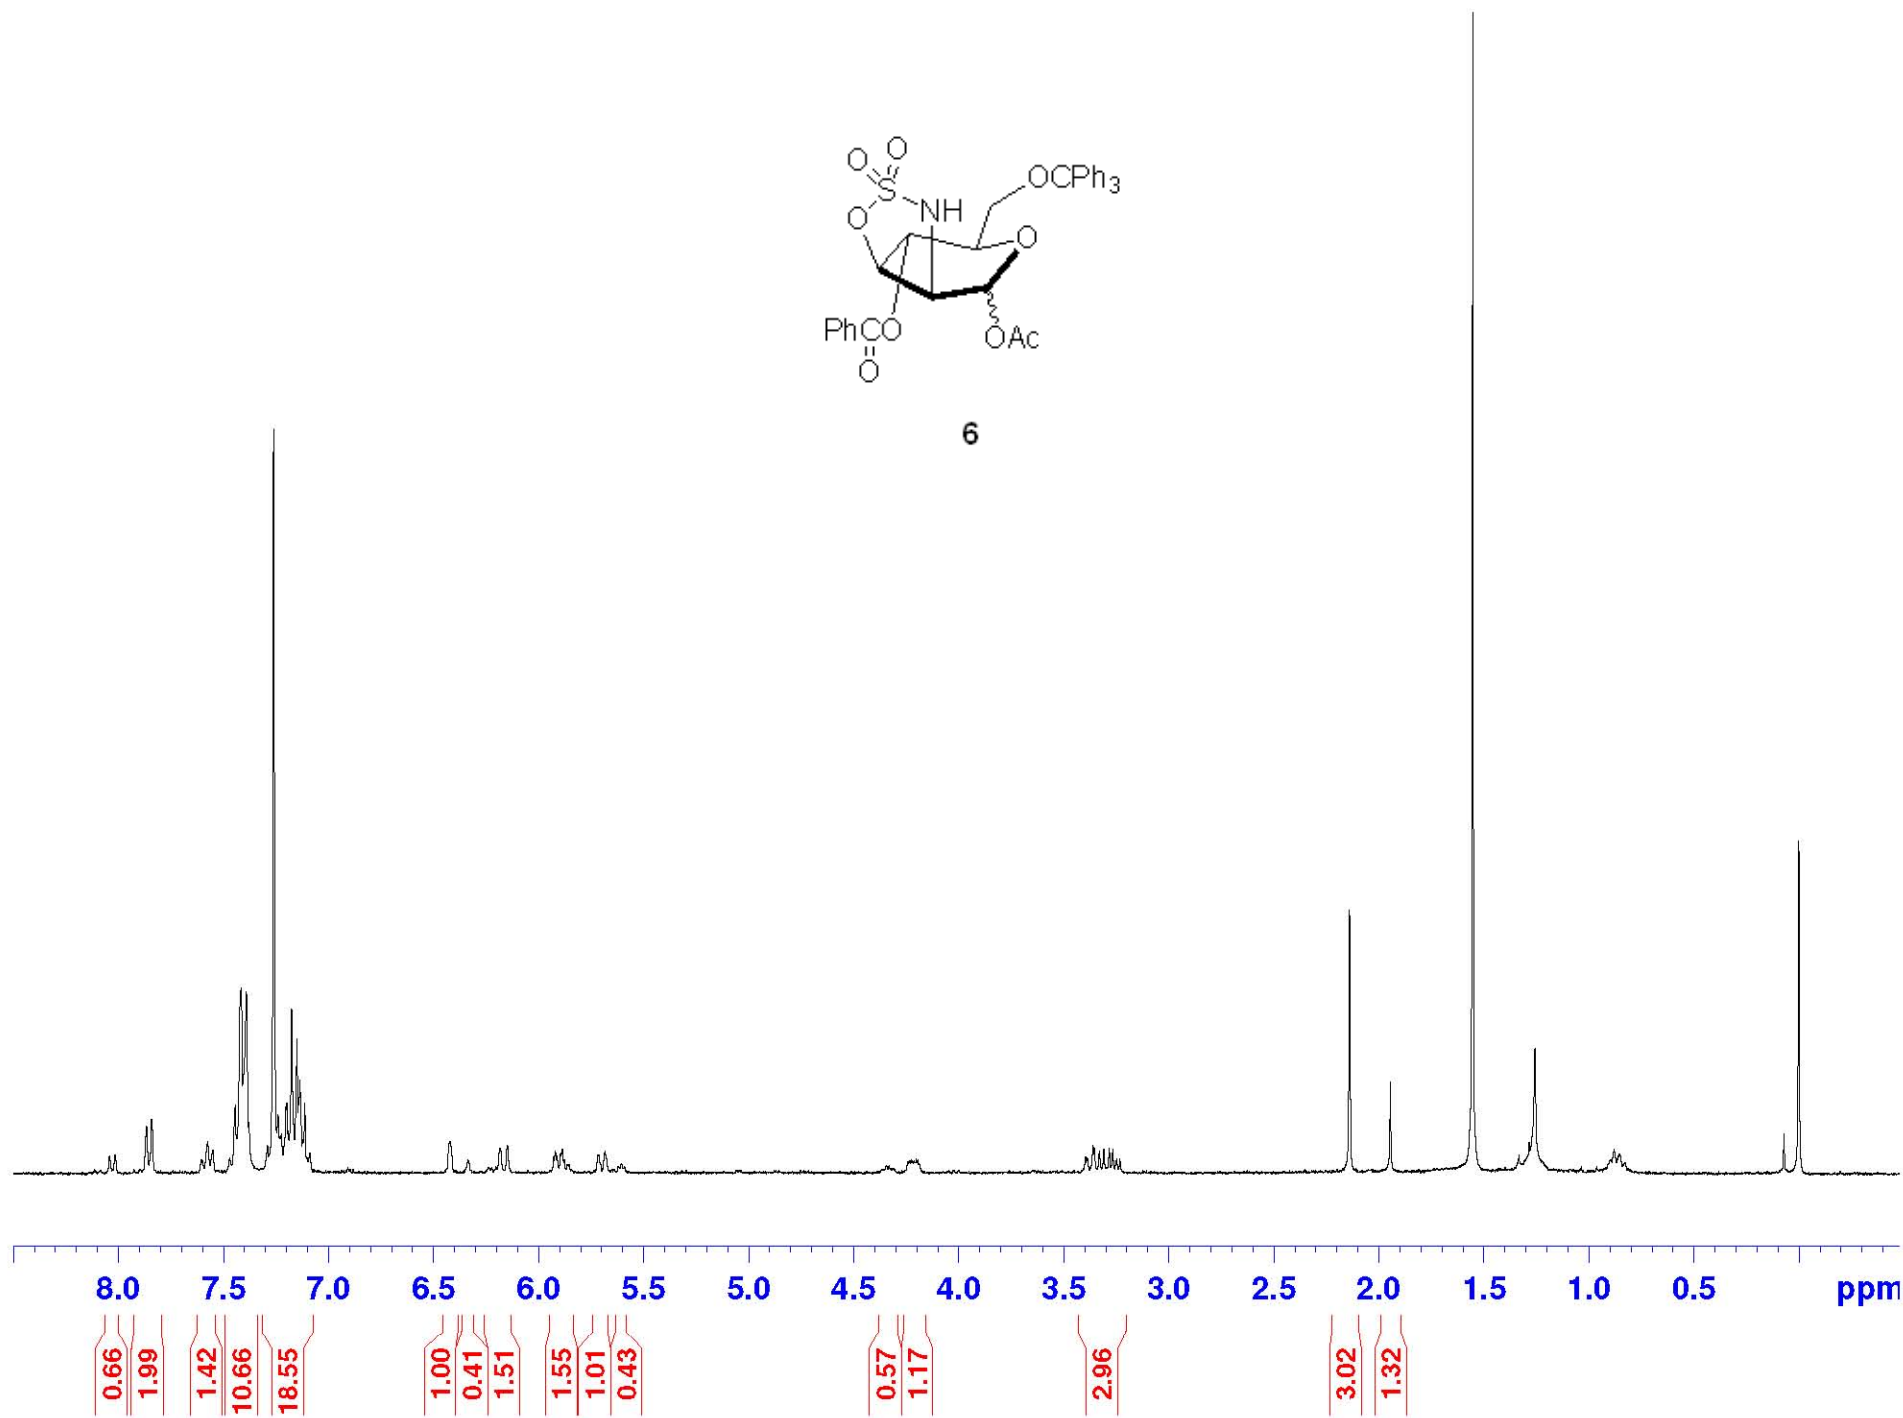

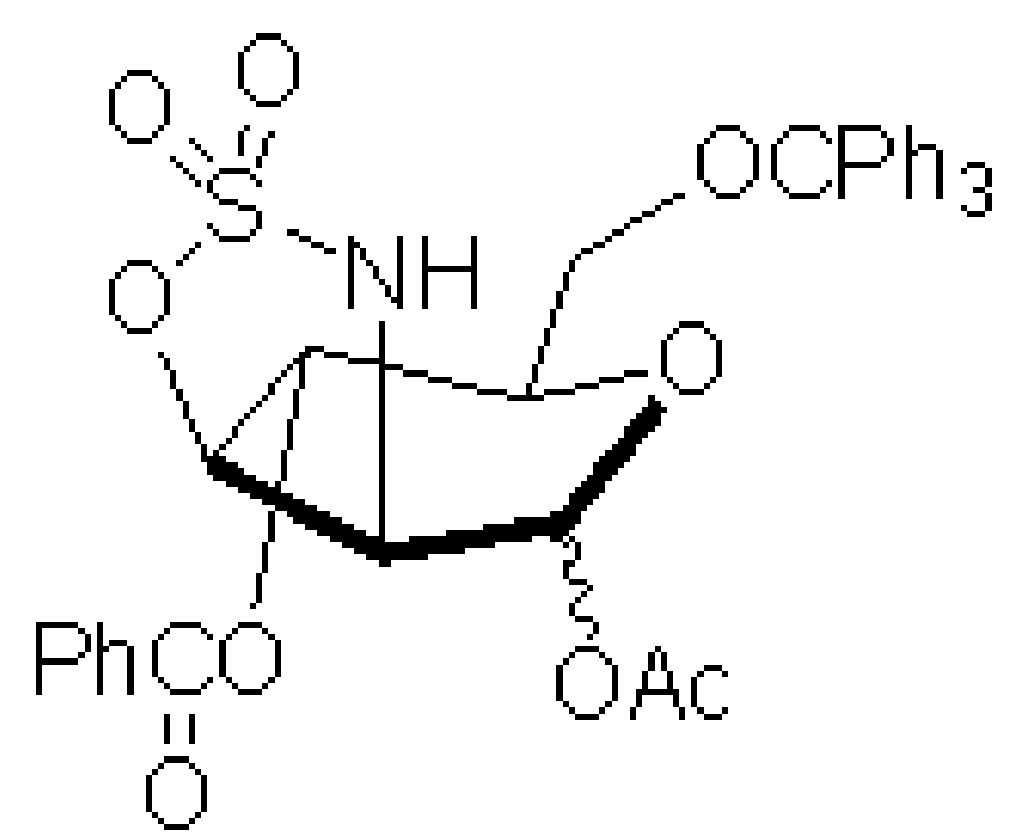

6

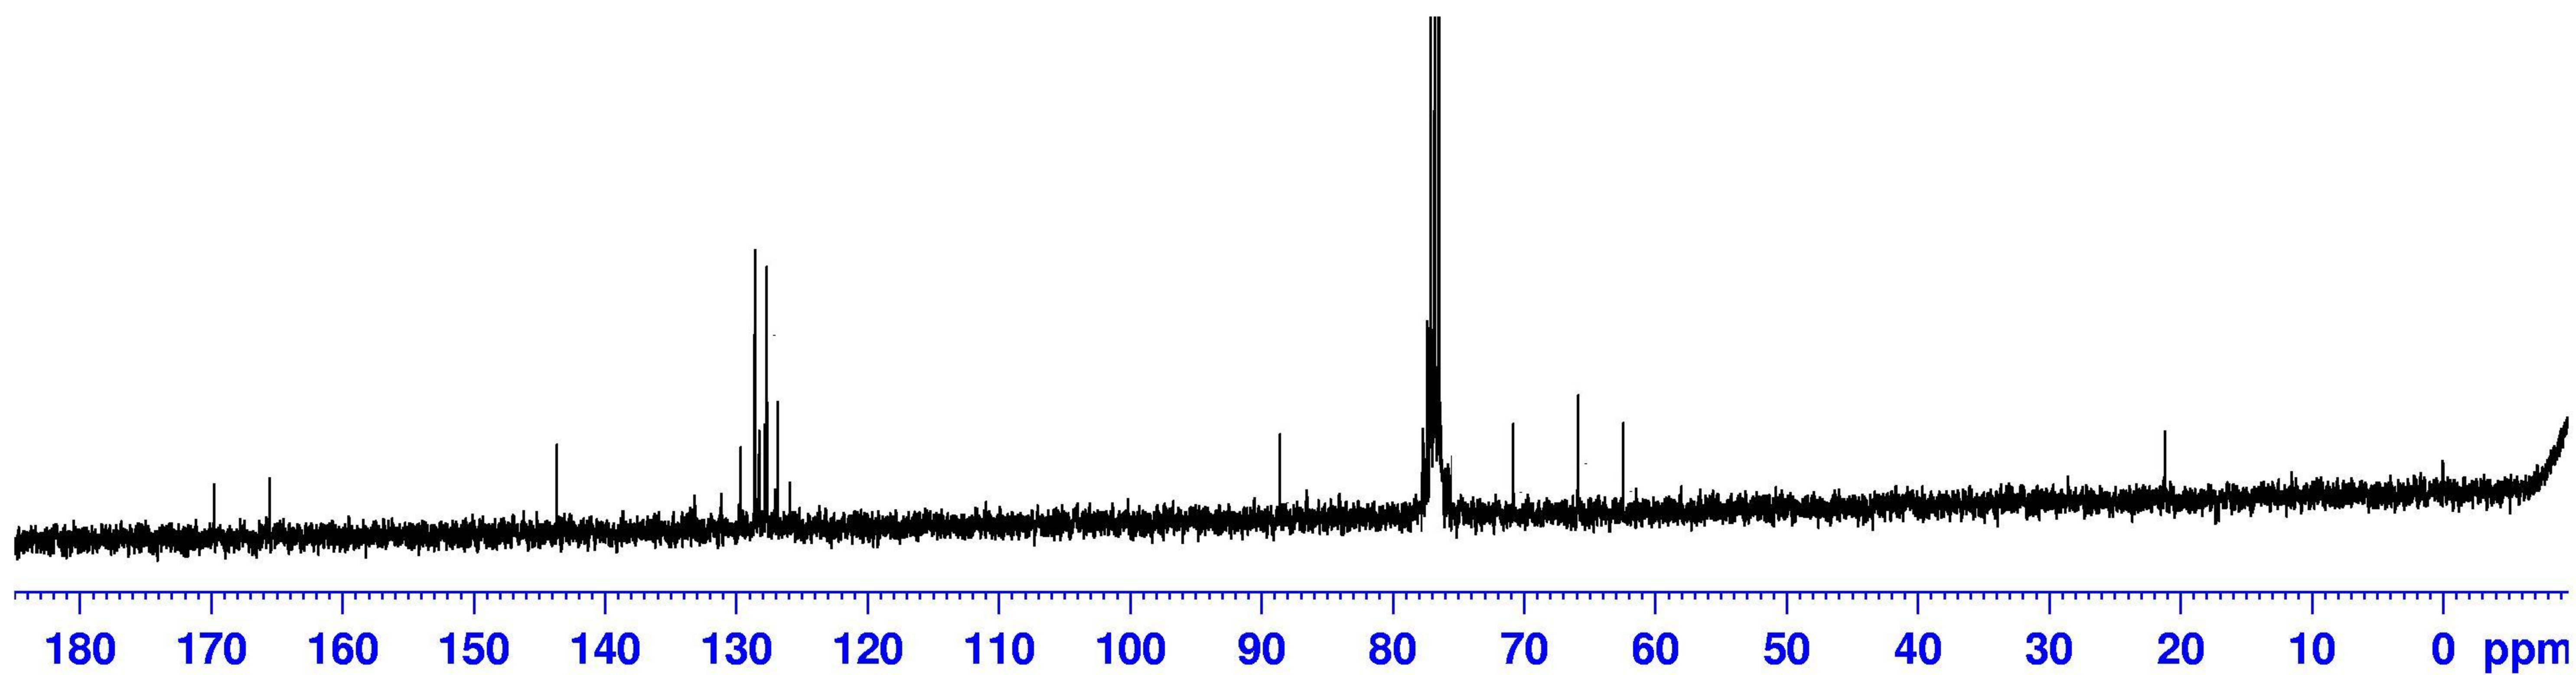

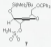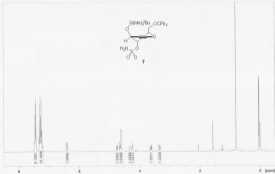

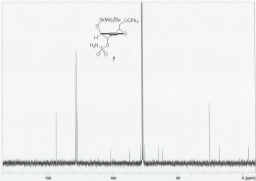



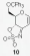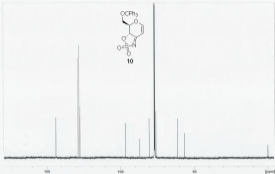



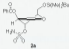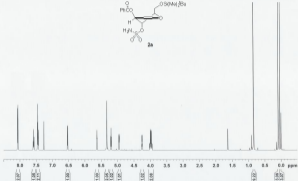

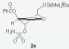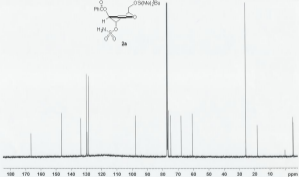

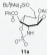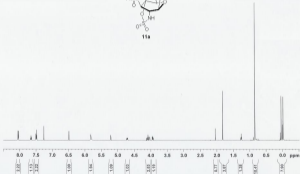

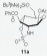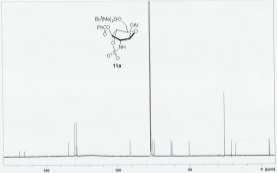

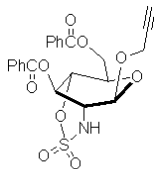

11d

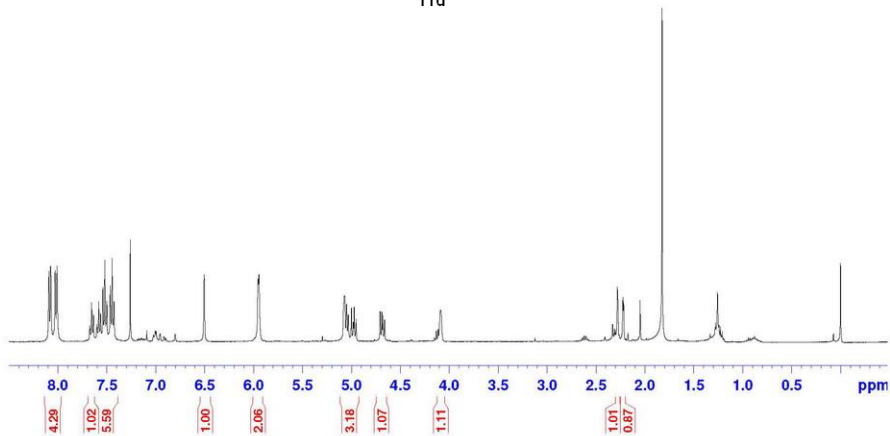

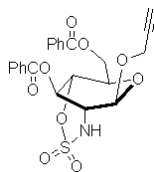

11d

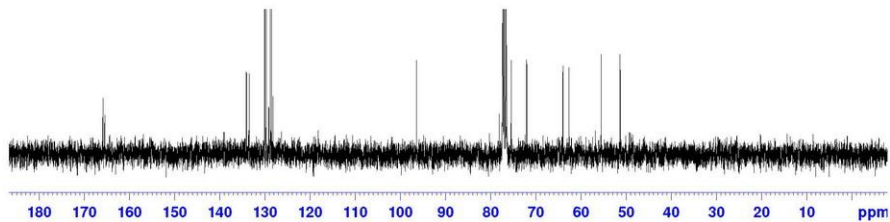

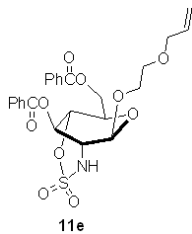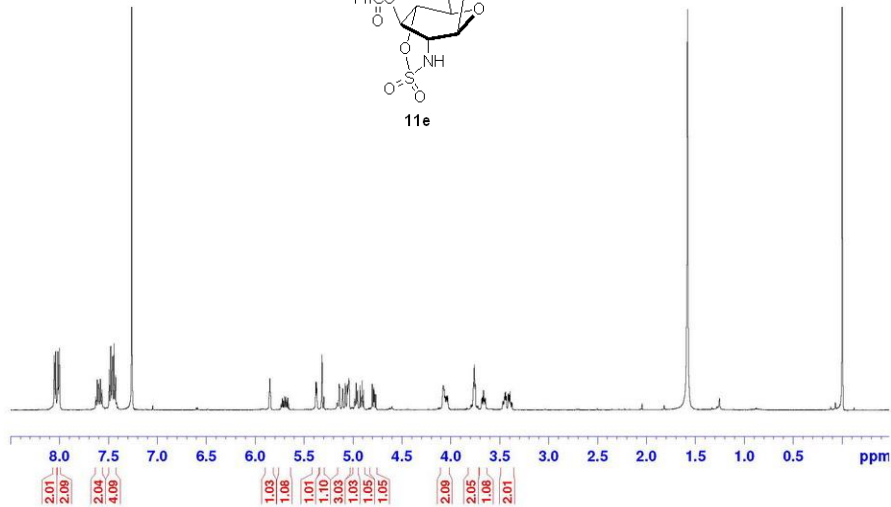

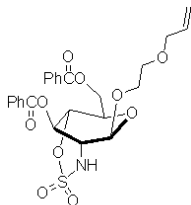

**11e**

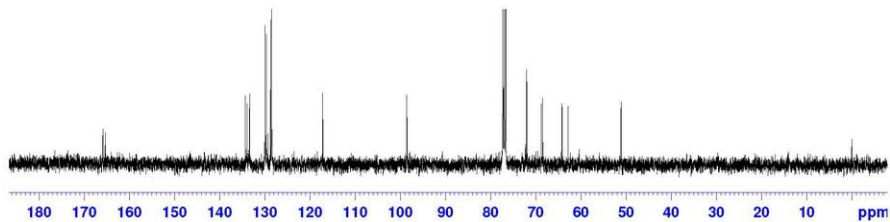



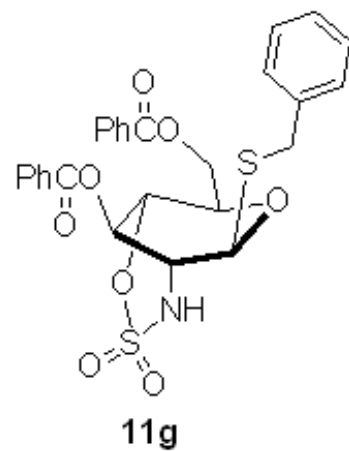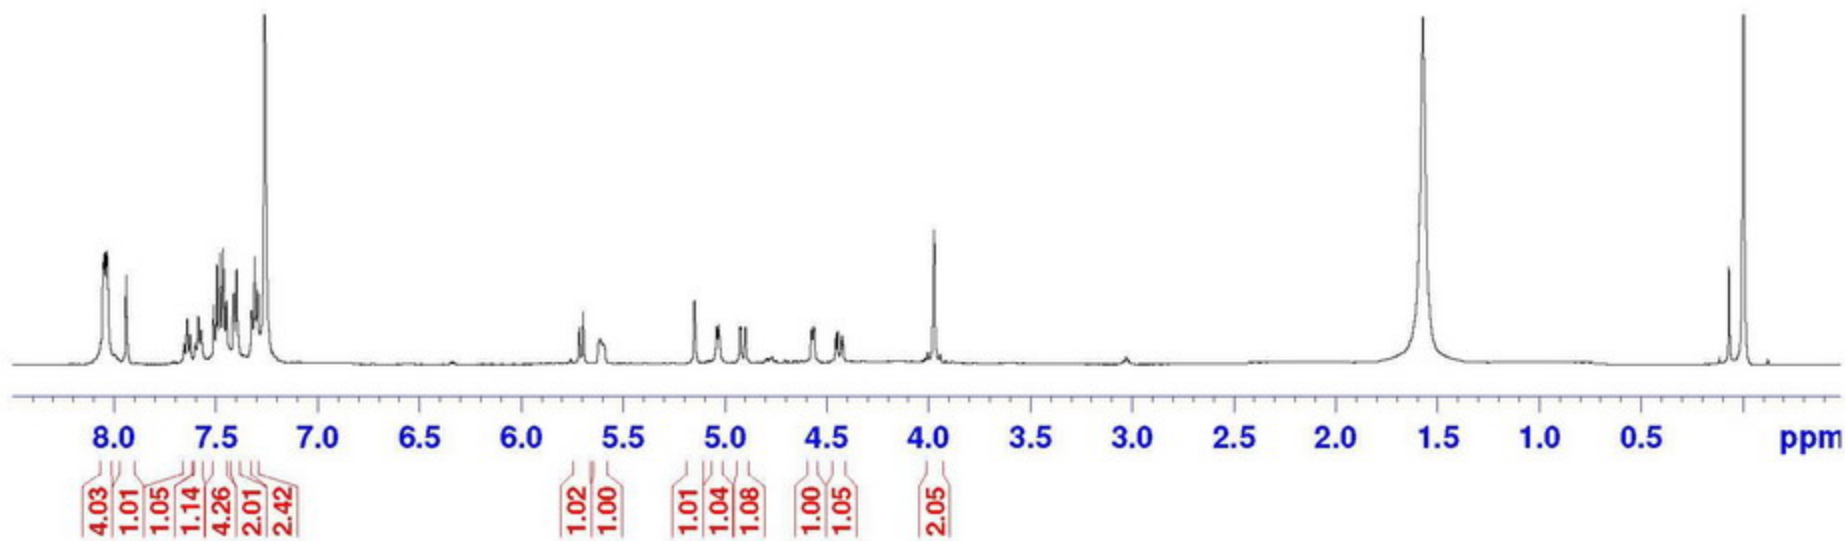

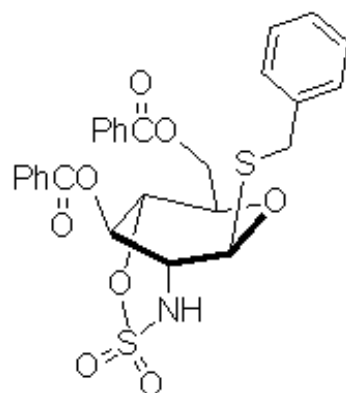

**11g**

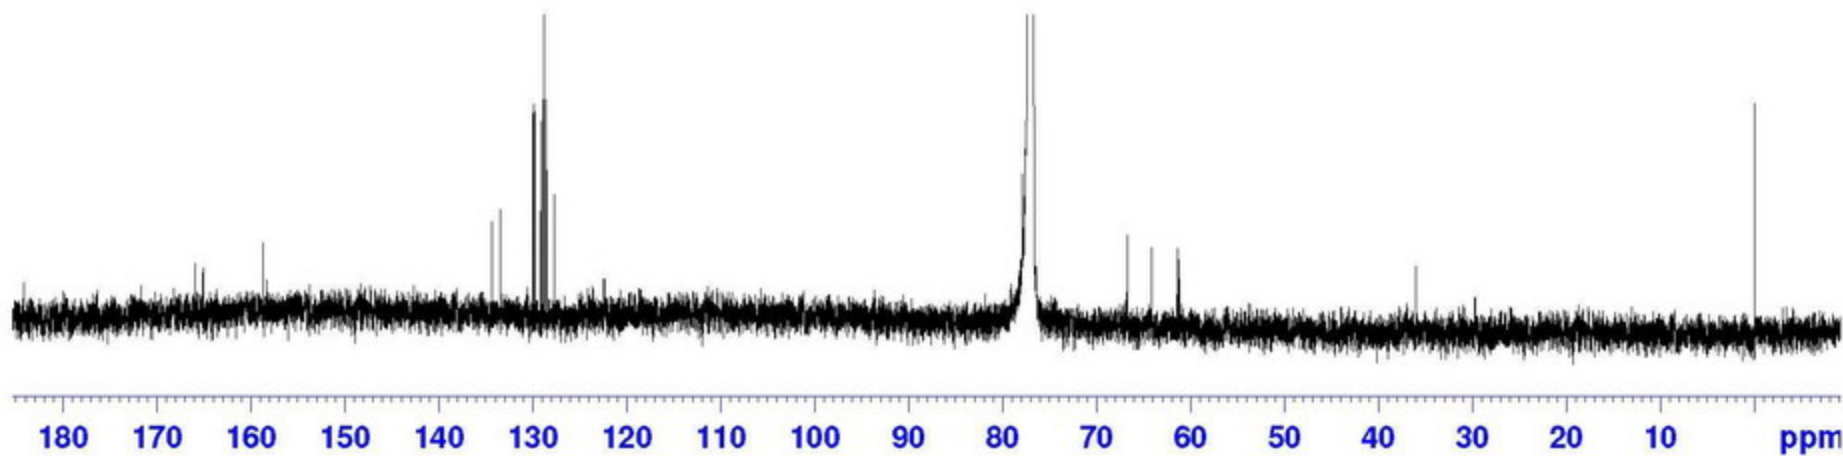

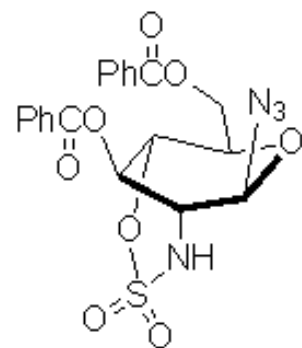

11i

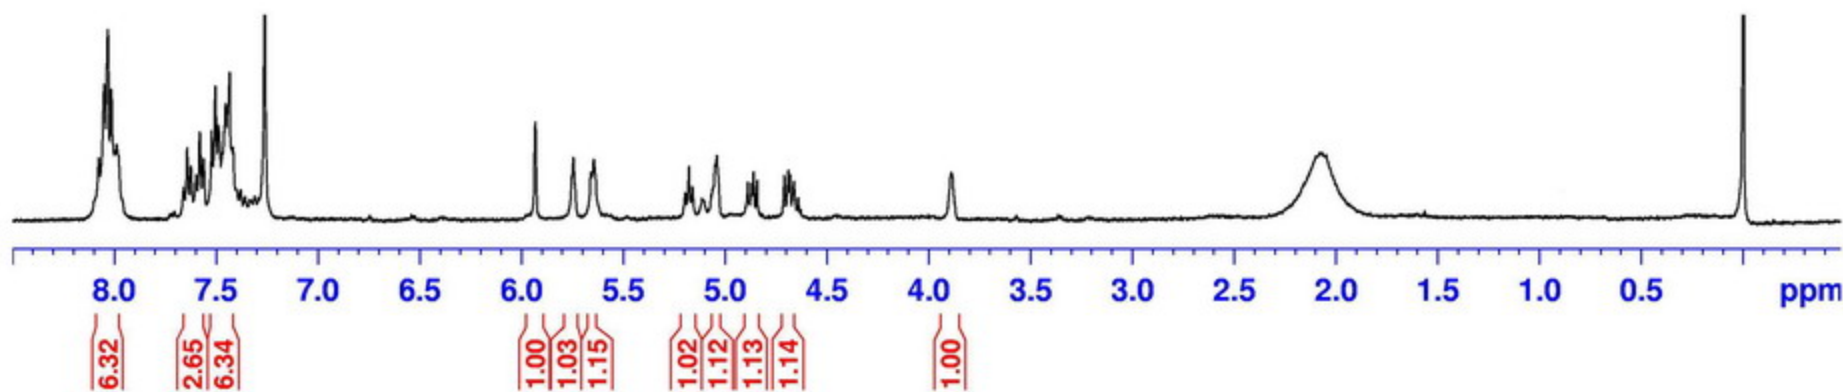

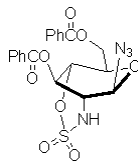

11i

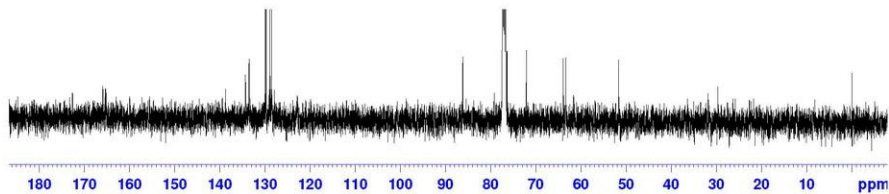

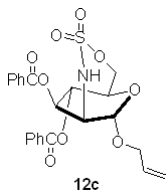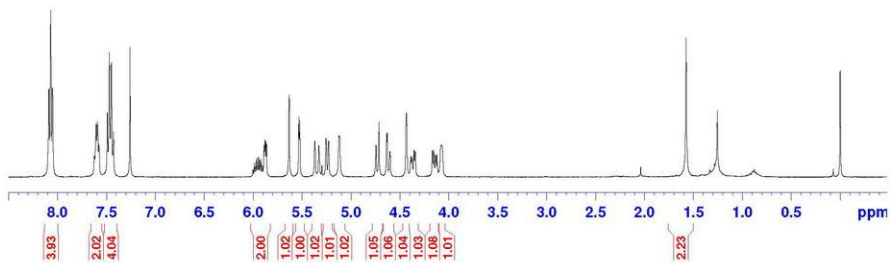

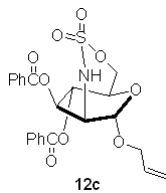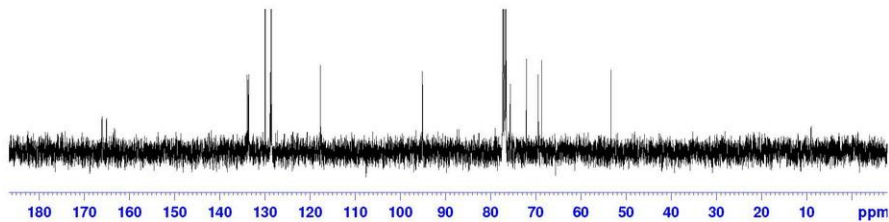

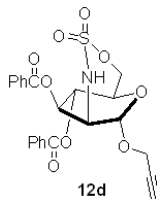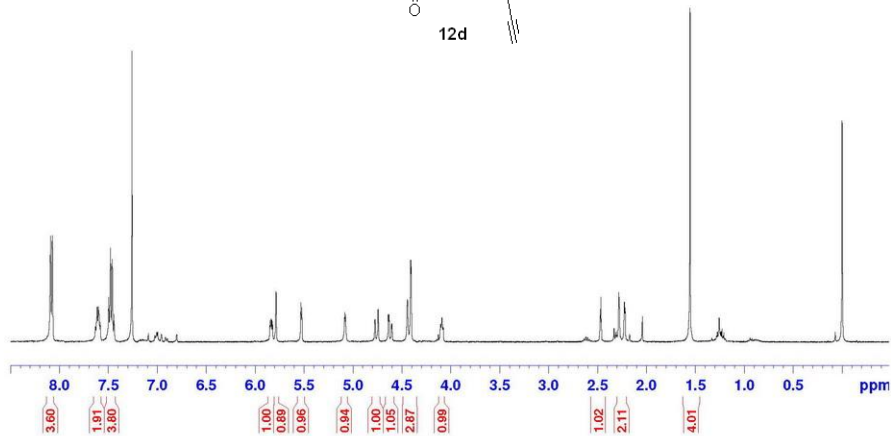

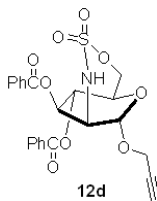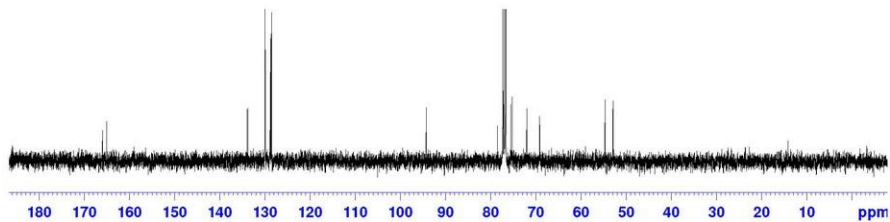



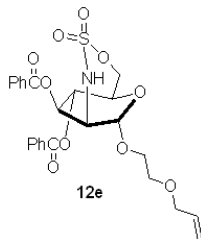

12e

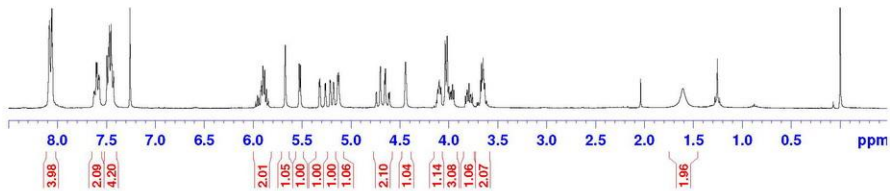

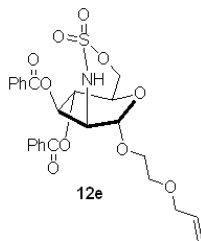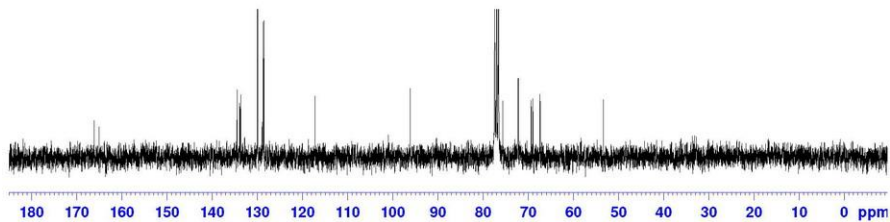

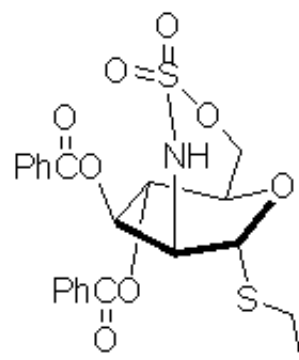

12f

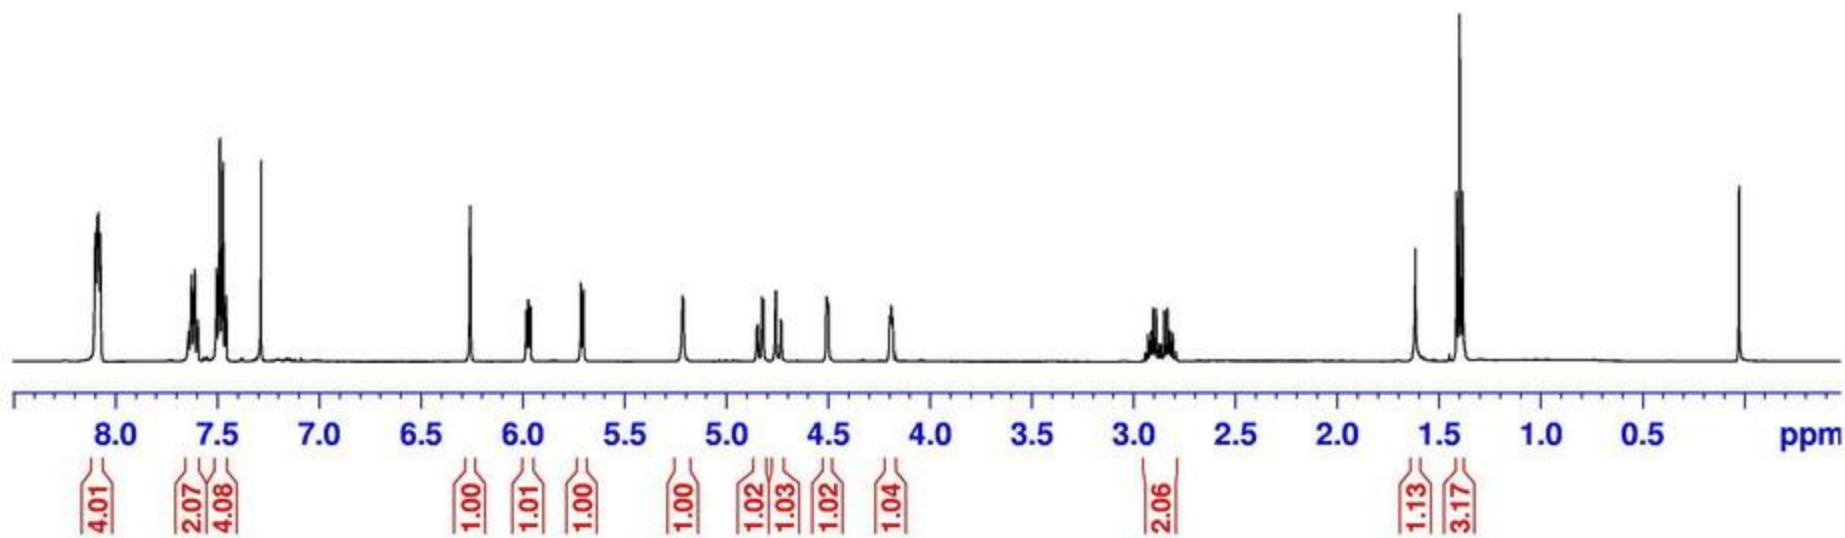

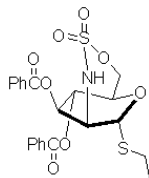

12f

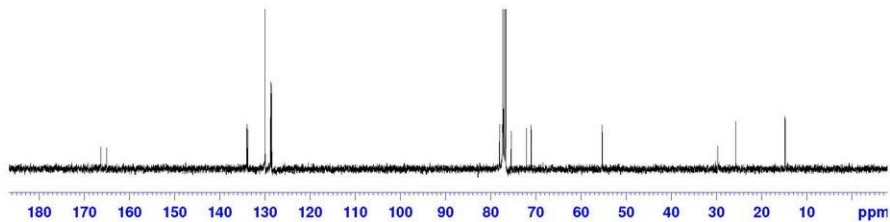

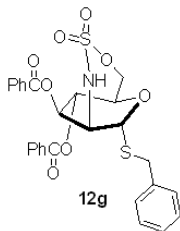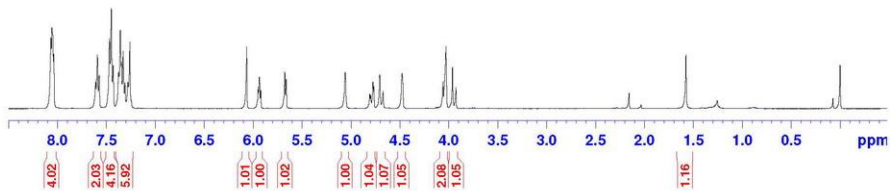

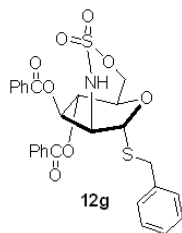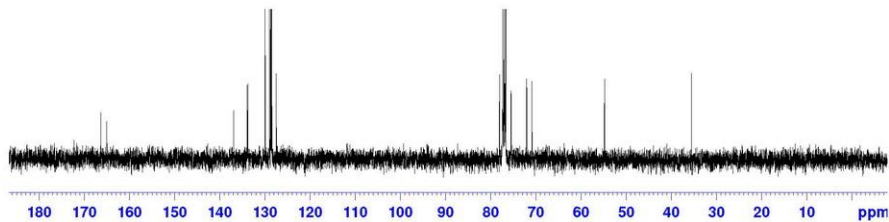

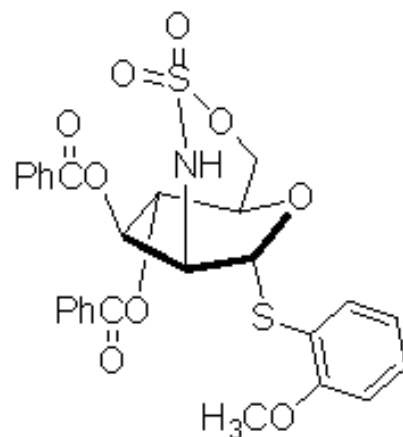

12h

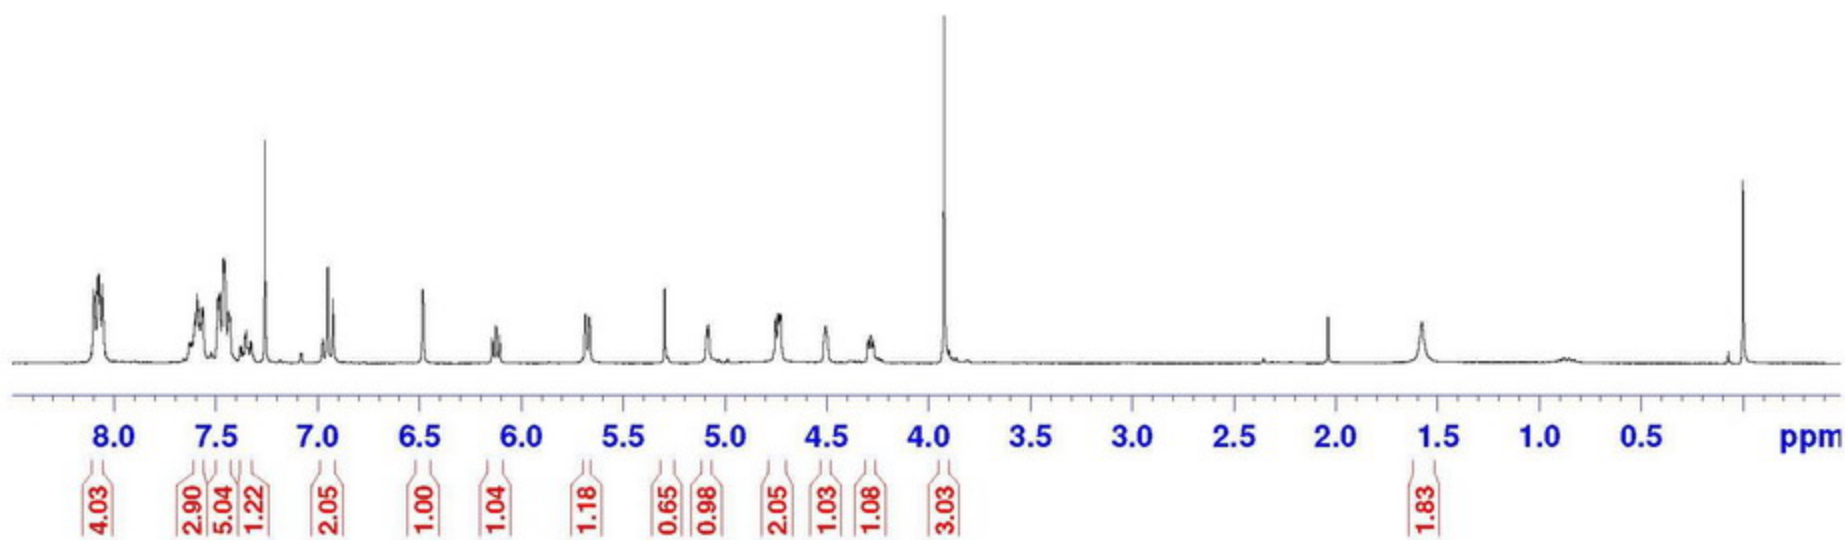

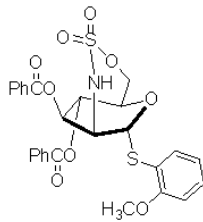

12h

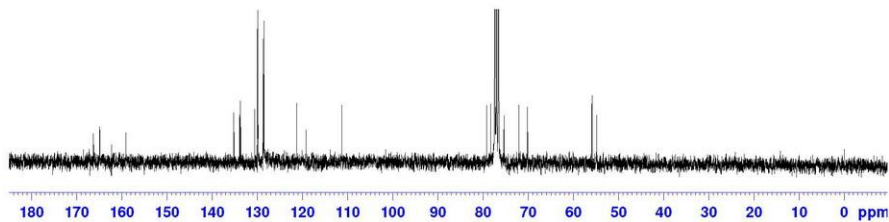



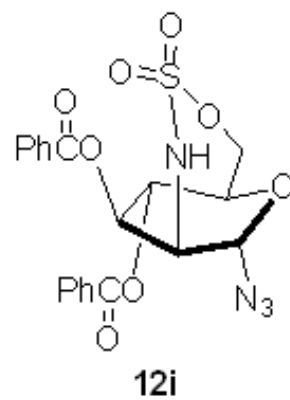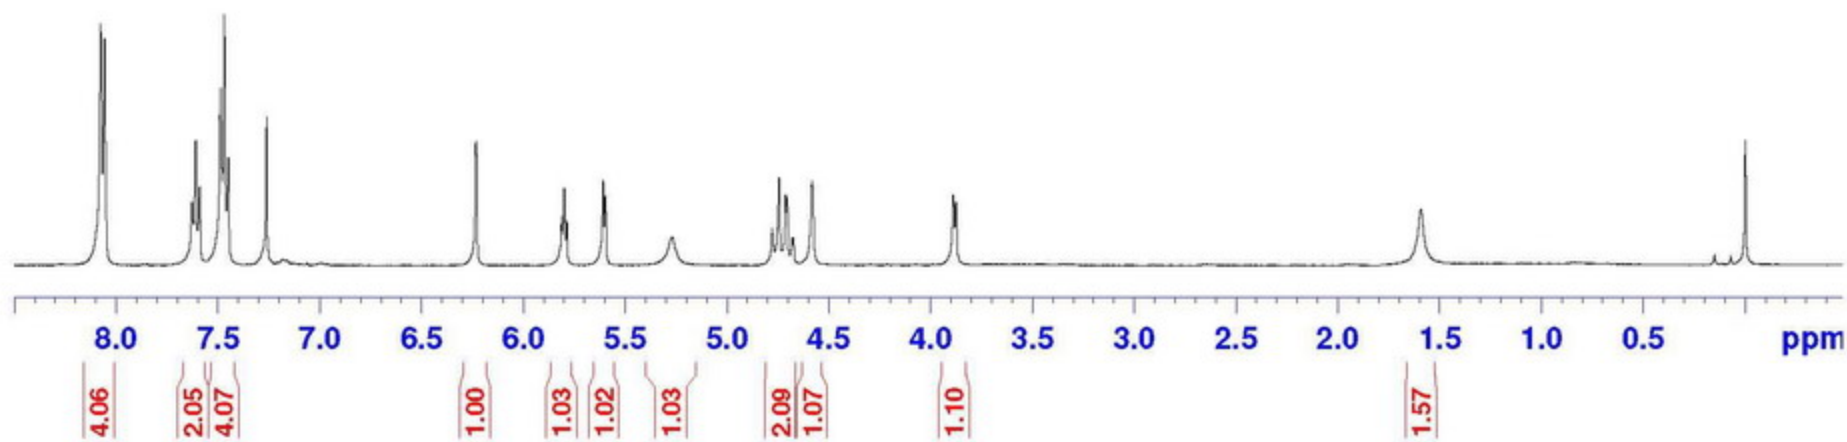

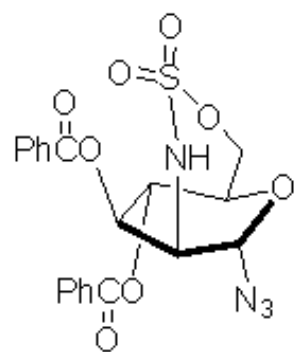

12i

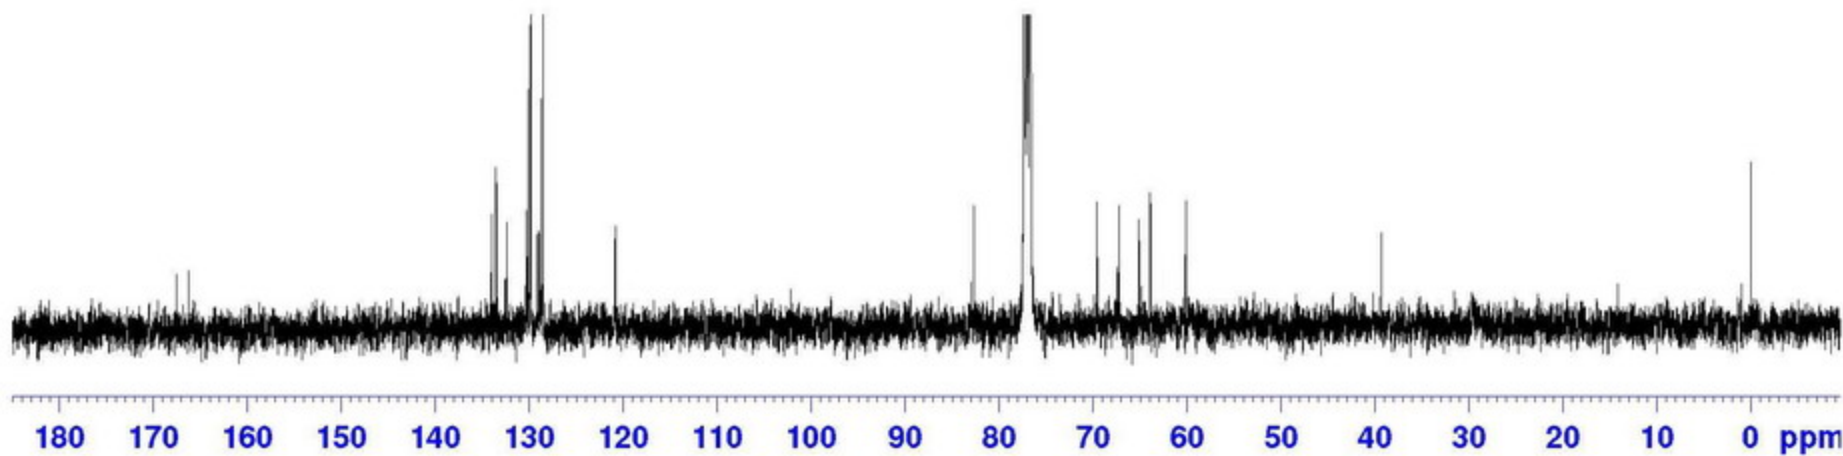

Supplement: b823099b_2.pdf [file b823099b_2.pdf]
